# Supplementary material
Source: publisher figshare collection journal article supplement (https://frontiersin.figshare.com/ndownloader/files/28105434)
Supplement: Supplementary file 1 [file 28105434]

## Sheet: Sheet1
Supplementary Table 5S Additional details on sequencing per sample/lane. Columns include: overall read volumes for all samples in millions of reads (column "M Seqs"); Percentage of reads surviving adapter trimming for each sample ; read mapping rates against the assembly prior to and after processing with Psytrans.
Sample Name	File Name	M Seqs	Percentage Surviving Adapter Trimming	Overall Mapping Rate (pre-Psytrans)	Overall Mapping Rate (after Symbiodiniaceae removed with Psytrans)
Pd-C	Pd_T107_CAK9TANXX_ATGTCA_L007	15.3	95.9	84.29	52.02
Pd-C	Pd_T107_CAK9TANXX_ATGTCA_L008	15.4	95.9	84.26	52.06
Pd-Lc	Pd_T116_CAK9TANXX_CTTGTA_L007	14.3	96.2	85.03	55.76
Pd-Lc	Pd_T116_CAK9TANXX_CTTGTA_L008	14.4	96.2	84.98	55.76
Pd-Le	Pd_T119_CAK9TANXX_ACAGTG_L007	15.9	96.4	85.37	53.07
Pd-Le	Pd_T119_CAK9TANXX_ACAGTG_L008	16	96.4	85.34	53.09
Pd-La	Pd_T2_CAK9TANXX_GCCAAT_L007	15.4	96.1	84.67	48.45
Pd-La	Pd_T2_CAK9TANXX_GCCAAT_L008	15.6	96	84.65	48.45
Pd-Ld	Pd_T83_CAK9TANXX_AGTTCC_L007	14.3	95.7	83.98	57.64
Pd-Ld	Pd_T83_CAK9TANXX_AGTTCC_L008	14.4	95.6	83.88	57.65
Pd-Lb	Pd_T98_CAK9TANXX_AGTCAA_L007	12.1	96.6	85.32	56.25
Pd-Lb	Pd_T98_CAK9TANXX_AGTCAA_L008	12.2	96.6	85.32	56.28
Pf-La	Pf_T104_CAK9TANXX_GTGAAA_L007	15.5	95.8	84.01	54.61
Pf-La	Pf_T104_CAK9TANXX_GTGAAA_L008	15.7	95.8	83.93	54.63
Pf-Lb	Pf_T53_CAK9TANXX_GTTTCG_L007	14.4	95.4	84.05	54.13
Pf-Lb	Pf_T53_CAK9TANXX_GTTTCG_L008	14.5	95.3	83.96	54.16
Pf-C	Pf_T68_CAK9TANXX_CCGTCC_L007	15.1	94.2	79.17	54.75
Pf-C	Pf_T68_CAK9TANXX_CCGTCC_L008	15.2	94.1	79.09	54.78
Pf-Le	Pf_T71_CAK9TANXX_CAGATC_L007	13.8	95.5	81.7	50.15
Pf-Le	Pf_T71_CAK9TANXX_CAGATC_L008	13.9	94.9	81.65	51.18
Pf-Ld	Pf_T74_CAK9TANXX_TGACCA_L007	13.3	95.4	82.95	51.68
Pf-Ld	Pf_T74_CAK9TANXX_TGACCA_L008	13.4	95.3	82.89	51.68
Pf-Lc	Pf_T89_CAK9TANXX_CGATGT_L007	15.7	95.4	83.47	52.11
Pf-Lc	Pf_T89_CAK9TANXX_CGATGT_L008	15.8	95.4	83.44	52.13
